# Supplementary material for: Locomotor recovery after spinal cord injury: intimate dependence between axonal regeneration and re-connection
Source: PubMed Central journal article supplement — Neural Regen Res. 2021 Aug 4;17(3):553–4. doi: 10.4103/1673-5374.320977 (PMC8504387; doi:10.4103/1673-5374.320977), 2021-08-04
Supplement: NRR-17-553_Suppl1.pdf [file NRR-17-553_Suppl1.pdf]

## OPEN PEER REVIEW REPORT 1

**Name of journal:** Neural Regeneration Research

**Manuscript NO:** NRR-D-21-00215

**Title:** Locomotor recovery after spinal cord injury: intimate dependence between axonal regeneration and re-connection

**Reviewer's Name:** David Romeo-Guitart

**Reviewer's country:** Spain

**Date sent for review:** 2021-3-18

### COMMENTS TO AUTHORS

In this perspective, the author summarizes his recent findings about the therapeutic potential of Netrin-1 after spinal cord injury. The perspective is well written, but it can be improved. In general, I encourage the author to improve the English and the structure of some sentences.

My minor concerns are:

- 1.- The first paragraph needs to be reorganized and rewritten.
- 2.- Pg. 2 Line 12. Transection instead of "transaction"
- 3.- Pg. 2 line 22. Figure 4??
- 4.- Pg. 2 line 40 ".."
- 5.- Pg. 3 line 10: "in situ". I recommend changing it to acute Netrin-1 treatment.
- 6.- I recommend extending the molecular part, discussing about possible potential molecular mediators (cellular processes or specific molecular targets). In addition, it could be interesting to add more perspectives on the potential of this drug in other neurotraumas or injuries of the nervous system such as traumatic brain injury/peripheral nerve injury.
- 7.- I suggest the author to delete the last sentence: "In order to comply with the permitted characters, I apologize in advance for not describing most of the work mentioned in this perspective."
- 8.- The author can include in the figure some insight about the molecular mechanisms of Netrin-1. Finally, adding extra information in the figure, such as which function is recovered after the treatment, may be useful for the understanding of the perspective. Also the quality of figure should be improved.
